1 **Title**

2 First SARS-CoV-2 detection in river water: implications in low sanitation countries

3

4 **Author names and affiliations**

5 Laura Guerrero-Latorre<sup>1,2</sup>, Isabel Ballesteros<sup>1</sup>, Irina M. Villacrés<sup>3</sup>, M. Genoveva

6 Granda<sup>3</sup>Byron P. Freire<sup>3</sup> & Blanca Ríos-Touma<sup>1,\*</sup>

7

8 1. Grupo de Investigación en Biodiversidad, Medio Ambiente y Salud. Facultad de

9 Ingenierías y Ciencias Aplicadas. Universidad de Las Américas, Ecuador.

10 2. Department of Biology, Area of Microbiology, University of Girona, Spain.

11 3. Laboratorios de Investigación. Universidad de Las Américas, Ecuador.

12 \*corresponding author: blanca.rios@udla.edu.ec

13

14 **Abstract**

15 Since the beginning of SARS-CoV-2 pandemic studies on viral shedding have reported  
16 that this virus is excreted in feces in most patients. High viral loads are found at the  
17 sewage pipeline or at the entrance of wastewater treatment plants from cities where  
18 the number of COVID-19 cases are significant. In Quito (Ecuador) as in many other  
19 cities worldwide, wastewater is directly discharged into natural waters. The aim of this  
20 study was to evaluate SARS-CoV-2 presence in urban streams from a low sanitation  
21 context. Three river locations along the urban rivers of Quito were sampled on the 5th  
22 of June during a peak of COVID-19 cases. River samples were evaluated for water  
23 quality parameters and afterwards, concentrated for viral analysis using skimmed milk  
24 flocculation method. The viral concentrates were quantified for SARS-CoV-2 (N1 and  
25 N2 genes) and Human Adenovirus as a human viral indicator. The results showed that  
26 SARS-CoV-2 was detected for both target genes in all samples analyzed in a range of  
27 2,91E+05 to 3,19E+06 GC/L for N1 and from 2,07E+05 to 2,22E+06 GC/L for N2. The

28 high values detected in natural waters from a low sanitation region have several  
29 implications in health and ecology that should be further assessed.

30

31 **Keywords**

32 COVID-19; Andean Rivers; wastewater; viral dissemination; Ecuador; HadV

33

## 34 1. Introduction

35

36 Since the first detected case of unknown pneumonia in Wuhan (China), in half a year,  
37 SARS-CoV-2 has caused almost 8 million confirmed cases and more than 400.000  
38 deaths worldwide (WHO, 2020). Currently, Latin America is considered the epicenter of  
39 the pandemic (UN, 2020). Brazil reported Latin America's first case in late February  
40 2020, and since then, COVID-19 cases and deaths have increased widely throughout  
41 nearly every country in the region. In Ecuador, official reports declare more than 45.000  
42 cases and 3.800 deaths in the second week of June (SNGRE, 2020).

43 SARS-CoV-2 transmission in humans is mainly airborne (Zhang *et al.*, 2020) but recent  
44 studies suggest that extended shedding of SARS-CoV-2 in feces is a potential health  
45 risk (Lodder and Roda Husman, 2020). As most COVID-19 cases fecally excreted the  
46 virus, SARS-CoV-2 has been detected in wastewater treatment plants from several  
47 cities around the world and some countries have started to monitor the viral load in  
48 sewage systems in an attempt to design early warnings for future outbreaks (Bivins *et*  
49 *al.*, 2020).

50 However, the fecal shedding in wastewater could be especially relevant in low  
51 sanitation countries where insufficient or nonexistent treatments of wastewater are  
52 applied.

53 Studies analyzing SARS-CoV-2 in sewage have tested the efficiency after wastewater  
54 treatments applied and in most cases effluent waters did not show the presence of  
55 SARS-CoV-2 (Randazzo *et al.*, 2020a). Moreover, in Japan, Haramoto *et al.* 2020  
56 looked for SARS-CoV-2 in rivers impacted by sewage, and did not detect its presence.

57 In most countries of Latin America an average of 30% of wastewaters are treated  
58 before discharging in water bodies (Rodriguez *et al.*, 2020). In particular, Ecuador has  
59 less than 20% of treatment coverage for its wastewaters (Rodriguez *et al.*, 2020) and  
60 its capital city, Quito with almost 3 million inhabitants only treats 3% of its sewage  
61 (EPMAPS, 2020). Therefore, the urban rivers of Quito, whose receive the fecal waters

62 from the whole city, are highly contaminated by human microorganisms and other  
63 pollutants, disseminating them along the river basin and crossing from up 2800 masl to  
64 the Pacific coast (Guerrero-Latorre et al., 2018; Voloshenko et al 2015). Previous  
65 studies have described the viral diversity of human pathogens present in the urban  
66 rivers of Quito and highlighting the health risk of populations that can use downstream  
67 waters for irrigation or recreational purposes (Guerrero-Latorre et al 2018). In the  
68 context of the COVID-19 pandemic, very little information has emerged from low  
69 sanitation countries about the presence of SARS-Cov-2 in sewage and natural waters.  
70 Therefore, this is the first study in a low sanitation country that attempted to analyze the  
71 presence of SARS-CoV-2 in river waters impacted by urban wastewater.

72

## 73 **2. Material and methods**

### 74 **2.1 Sampling**

75

76 The 5th of June 2020 three locations from Quito's river were sampled. Sampling  
77 locations are representative from south-center (M1), north-center (M2) and north (M3)  
78 accumulated wastewater discharges into the natural streams passing through the city  
79 (Figure 1, EPMAPS, 2011). At each location, 2 L samples were collected for viral  
80 analysis and 2 L for other biological and chemical measurements: DBO<sub>5</sub>, DQO, pH and  
81 conductivity. Samples were preserved at 4 °C and taken to the laboratory in less than 3  
82 hours.

83

### 84 **2.2 Water concentration and RNA extraction**

85

86 Collected water was concentrated for viral analysis using an adapted Skimmed Milk  
87 Flocculation method using 2 L of water (Fernandez-Cassi *et al.*, 2018). Briefly, sample  
88 was preconditioned at pH 3.5 and a conductivity above 1.5 mS/cm<sup>2</sup>. Then, 10 ml of

89 pre-flocculated skimmed milk solution were added. After 8 h of stirring, flocks were  
90 centrifuged at 8,000× g for 40 min, and the pellet was suspended in 10 mL of  
91 phosphate buffer. Nucleic acids were extracted using AccuPrep® Universal RNA  
92 Extraction Kit - Bioneer from 200 ul of the viral concentrates into 40 ul of eluted  
93 solution.

94

### 95 **2.3 qRT-PCR analysis**

96 Nucleic acid extractions from viral concentrates were used to analyze by RT-qPCR  
97 SARS-CoV-2 using N1 and N2 primer sets (CDC, 2020) and Human Adenovirus as a  
98 microbial indicator of human fecal contamination (Allard *et al.*, 2001).

99 The volume of original water sample analyzed in each PCR reaction after concentration  
100 and extraction steps is 3 µL for SARS-CoV-2 using TaqMan Fast Virus 1-Step Master  
101 Mix (ThermoFisher) and 10 µL for HAdV using Environmental TaqMan MasterMix  
102 (ThermoFisher). Quantitative PCRs were run in Bio-Rad CFX96 qPCR thermocycler.  
103 The inhibition was analysed by testing the direct and 1/10 diluted extractions for each  
104 qPCR or RT-qPCR.

105

### 106 **2.4 Cases per sampling point**

107

108 In order to relate SARS-CoV-2 viral load in river water samples with reported COVID-  
109 19 cases in Quito, we gathered information from the sectors of Quito that discharge  
110 sewage to the sampling points according to the Potable Water and Sanitation  
111 Enterprise of Quito (EPMAPS, 2011). Since the city of Quito reports its cases by these  
112 sectors we gather current and historical information from 14 days prior to the sampling  
113 points (<https://twitter.com/MunicipioQuito/>). This information was validated with the  
114 official government reports (SNGRE, 2020).

115

116 **3. Results**

117

118 Water quality parameters of samples analyzed show an important anthropogenic  
119 impact in the rivers (Table 1). Sampling points M2 and M3 do not meet the national  
120 requirement for aquatic life preservation for DQO and DBO<sub>5</sub> (Ministerio del Ambiente  
121 de Ecuador, 2015). Human Adenovirus, a viral indicator used to evaluate the microbial  
122 impact in river water present high quantities corresponding to strong impact (Rusiñol *et*  
123 *al.* 2014)

124 SARS-CoV-2 genes (N1 and N2) were present in the three locations and show  
125 concentrations ranging from 2,84E+05 to 3,19E+06 GC/L for N1 target gene and from  
126 2,07E+05 to 2,23E+06 for N2 target gene (Table 2).

127 These values are clearly related to COVID-19 cases reported in the contributing areas  
128 for each point, showing higher values where higher active cases were registered (Table  
129 2). The collection of samples was during a peak of the outbreak, since the active cases  
130 (considered the notified cases in the last 14 days prior to the sampling day) represent  
131 25% of the total cases of COVID19 reported in the city since the beginning of the  
132 outbreak.

133

134 **4. Discussion**

135

136 This is the first study that reports SARS-CoV2, and in important quantities, in rivers,  
137 however other studies have attempted to find it without success (Haramoto *et al.*,  
138 2020). The urban river of Quito is impacted by the direct discharge of sewage water  
139 from a population of almost 3 million inhabitants. The water quality parameters  
140 described in Table 1 indicate the high levels of organic and inorganic contamination  
141 from those urban rivers. The water parameters measured in 2 of the 3 locations studied  
142 were above the national regulations for aquatic life preservation (Ministerio del

143 Ambiente de Ecuador, 2015). However, all environmental values are higher than those  
144 registered for reference sites in this same basin (Ríos-Touma *et al.*, 2014)

145

146 Viral human contamination analyzed by HAdV indicator shows the great impact of  
147 human excreta in the urban rivers of Quito. Values are very similar from the samples  
148 collected in the same locations in 2017 (Guerrero-Latorre *et al.*, 2018). In that study, a  
149 metagenomic analysis was carried out in the same locations and sequences from 26  
150 human viral pathogens were obtained, revealing the microbial consequences of  
151 sewage discharge without previous treatment into natural streams.

152

153 Nowadays, in the peak of COVID-19 pandemic in Ecuador, levels of SARS-CoV-2  
154 found in urban rivers of Quito are similar as found in sewage of Valencia (Spain) with  
155 more than 5000 active cases (Randazzo *et al.* 2020b) and Paris in the epidemic peak  
156 of cases with more than 10000 hospitalized cases (Wurtzel *et al.*, 2020). However, at  
157 the sampling date in the urban area of Quito only 750 COVID-19 active cases were  
158 notified, suggesting an important underdiagnose as seen in many other regions  
159 worldwide.

160

161 The implications from our study can be extended to other cities where the sewage is  
162 directly discharged into natural streams. Firstly, SARS-CoV-2 presence as other  
163 microbial pathogens discharged in open river water might pose a risk of infection for  
164 the population in contact with the water downstream. The risk has been recently  
165 approached in a QMRA study of WWTP workers exposed to a different concentration  
166 of SARS-CoV-2 in sewage (Zaneti *et al.*, 2020). However, it is important to remark that  
167 only genomic material has been detected in waters and the viability of the virus is not  
168 known for polluted waters. Secondly, the viral dissemination into the environment has  
169 an unknown impact into livestock and wildlife health, as the spillover events of zoonotic  
170 links are frequent in the coronaviridae family (Franklin and Bevins, 2020).

171 Finally, the presence of the virus can be also used as a surveillance tool for an early  
172 warning system using main sewage discharges along the city helping to control the  
173 pandemic where diagnostic tools are limited (Bivins *et al.*, 2020). Also, the method  
174 implemented in the present publication can be used in other cities where sewage is not  
175 possible to sample and wastewaters are discharged to streams or rivers.

176

## 177 **5. Conclusions**

178

179 We have detected for the first time important viral loads of SARS-CoV-2 from rivers in  
180 urban streams of Quito. The loads found suggest that cases are probably a lot higher  
181 than the official data. Also, implications in dissemination of SARS-CoV-2 in low  
182 sanitation countries by polluted freshwaters should be further considered. The low  
183 degree of wastewater treatment coverage in the region, might be a factor of increased  
184 risk for COVID-19 pandemic.

185

## 186 **Acknowledgements**

187 Special thanks to Xavier Amigo and Nature Experience for its invaluable service during  
188 the sampling campaign.

189

## 190 **Funding**

191 This work was supported by research funds from Universidad de Las Américas,  
192 Ecuador.

193

## 194 **6. References**

195 Allard, A., Albinsson, B., Wadell, G., Albinsson, B.O., 2001. Rapid Typing of  
196 Human Adenoviruses by a General PCR Combined with Restriction Endonuclease  
197 Analysis Rapid Typing of Human Adenoviruses by a General PCR Combined with



- 198 Restriction Endonuclease Analysis. *J. Clin. Microbiol.* 39, 498–505.
- 199 <https://doi.org/10.1128/JCM.39.2.498>
- 200 Bivins, A., North, D., Ahmad, A., Ahmed, W., Alm, E., Been, F., et al, 2020.
- 201 Wastewater-Based Epidemiology: Global Collaborative to Maximize Contributions
- 202 in the Fight Against COVID-19. *Environ. Sci. Technol.*
- 203 doi:10.1021/acs.est.0c02388
- 204 CDC, 2020. 2019-Novel Coronavirus (2019-nCoV) Real-Time RT-PCR Diagnostic
- 205 Panel. US Centers for Disease Control and Prevention.
- 206 <https://www.cdc.gov/coronavirus/2019-ncov/lab/rt-pcr-panel-primer-probes.html>
- 207 [Accessed 3 Mar 2020].
- 208 Empresa Pública Metropolitana de Agua Potable y Saneamiento. (2011). Estudios
- 209 de Actualización del Plan Maestro Integrado de Agua Potable y Alcantarillado
- 210 para el DMQ. Recuperado el 4 de febrero del 2018 de
- 211 [https://www.aguaquito.gob.ec/sites/default/files/documentos/plan\\_ma](https://www.aguaquito.gob.ec/sites/default/files/documentos/plan_maestro_agua_potable.pdf)
- 212 [estro\\_agua\\_potable.pdf](https://www.aguaquito.gob.ec/sites/default/files/documentos/plan_maestro_agua_potable.pdf)
- 213 Empresa Pública Metropolitana de Agua Potable y Saneamiento. (2020).
- 214 Programa para la descontaminación de los ríos de Quito.
- 215 [https://www.aguaquito.gob.ec/programa-para-la-descontaminacion-de-los-rios-de-](https://www.aguaquito.gob.ec/programa-para-la-descontaminacion-de-los-rios-de-quito/)
- 216 [quito/](https://www.aguaquito.gob.ec/programa-para-la-descontaminacion-de-los-rios-de-quito/). [Accessed June 13th, 2020]
- 217 Fernandez-Cassi, X., Timoneda, N., Martínez-Puchol, S., Rusiñol, M., Rodríguez-
- 218 Manzano, J., Figuerola, N., et al. 2018. Metagenomics for the Study of Viruses in
- 219 Urban Sewage as a Tool for Public Health Surveillance. *Sci Total Environ.* Mar
- 220 15;618:870-880. <https://doi.org/10.1016/j.scitotenv.2017.08.249>

- 221 Franklin, A. B., & Bevins, S. N. (2020). Spillover of SARS-CoV-2 into novel wild  
222 hosts in North America: A conceptual model for perpetuation of the pathogen. *The*  
223 *Science of the total environment*, 733, 139358. Advance online publication.  
224 <https://doi.org/10.1016/j.scitotenv.2020.139358>
- 225 Guerrero-Latorre, L., Romero, B., Bonifaz E., Timoneda, N., Rusiñol, M., Girones,  
226 R. and Rios-Touma, B. 2018. Quito's virome: Metagenomic analysis of viral  
227 diversity in urban streams of Ecuador's capital city. *Sci Total Environ*. 645, pp.  
228 1334 - 1343; doi: <https://doi.org/10.1016/j.scitotenv.2018.07.213>
- 229 Haramoto, E., Malla, B., Thakali, O., Kitajima, M., 2020. First environmental  
230 surveillance for the presence of SARS-CoV-2 RNA in wastewater and river water  
231 in Japan. medRxiv 2020.06.04.20122747; doi:  
232 <https://doi.org/10.1101/2020.06.04.20122747>
- 233 Lodder, W., de Roda Husman, A.M., 2020. SARS-CoV-2 in wastewater: potential  
234 health risk, but also data source. *Lancet Gastroenterol. Hepatol*. 5, 533–534.  
235 [https://doi.org/10.1016/S2468-1253\(20\)30087-X](https://doi.org/10.1016/S2468-1253(20)30087-X)
- 236 Ministerio del Ambiente de Ecuador. 2015. 097-A Refórmese el Texto Unificado  
237 de Legislación Secundaria. Registro Oficial. Año III - No 387. Quito, miércoles 4 de  
238 noviembre de 2015. P 6 a 78.
- 239 Randazzo, W., Truchado, P., Cuevas-Ferrando, E., Simon, P., Allende, A. and  
240 Sanchez, G. 2020a. SARS-CoV-2 RNA in wastewater anticipated COVID-19  
241 occurrence in a low prevalence area. *Water Research*. Volume 181, 15 August  
242 2020, 115942. <https://doi.org/10.1016/j.watres.2020.115942>
- 243 Randazzo, W., Cuevas-Ferrando, E., Sanjuan, R., Domingo-Calap, P., Sanchez,  
244 G., 2020b. Metropolitan Wastewater Analysis for COVID-19 Epidemiological

245 Surveillance. medRxiv 2020.04.23.20076679.

246 <https://doi.org/10.1101/2020.04.23.20076679>

247 Ríos-Touma, B., Acosta, R., Prat, N., 2014. The Andean biotic index (ABI):

248 Revised tolerance to pollution values for macroinvertebrate families and index

249 performance evaluation. Rev. Biol. Trop. 62, 249–273.

250 Rodriguez Hector, Alexander Delgado, Anna Nolasco, Daniel Saltiel, Gustavo, D.

251 J. S. 2020. From Waste to Resource. Water Papers. World Bank.

252 <https://doi.org/doi:10.1596/33436>

253 Rusiñol, M., Fernandez-Cassi, X., Hundesa, A., Vieira, C., Kern, A., Eriksson, I. *et*

254 *al.* (2014). Application of human and animal viral microbial source tracking tools in

255 fresh and marine waters from five different geographical areas. Water Research.

256 59, pp. 119-129. <https://doi.org/doi:10.1016/j.watres.2014.04.013>

257 SNGRE 2020. Informes de Situación e Infografías – COVID 19 – desde el 29 de

258 Febrero del 2020. [https://www.gestionderiesgos.gob.ec/informes-de-situacion-](https://www.gestionderiesgos.gob.ec/informes-de-situacion-covid-19-desde-el-13-de-marzo-del-2020/)

259 [covid-19-desde-el-13-de-marzo-del-2020/](https://www.gestionderiesgos.gob.ec/informes-de-situacion-covid-19-desde-el-13-de-marzo-del-2020/)

260 UN 2020. Central and South America now ‘intense zones’ for COVID-19

261 transmission. 1 June 2020 <https://news.un.org/en/story/2020/06/1065252>

262 Voloshenko-Rossin, A., Gasser, G., Cohen, K., Gun, J., Cumbal-Flores, L., Parra-

263 Morales, W., Sarabia, F., Ojeda, F., Lev, O., 2015. Emerging pollutants in the

264 Esmeraldas watershed in Ecuador: discharge and attenuation of emerging organic

265 pollutants along the San Pedro–Guayllabamba–Esmeraldas rivers. Environ. Sci.

266 Process. Impacts 17, 41–53. <https://doi.org/10.1039/C4EM00394B>

267 WHO. WHO Coronavirus Disease (COVID-19) Dashboard. 2020.

268 <https://covid19.who.int/>

269

270 Wurtzer, S., Marechal, V., Mouchel, JM., Maday, Y., Teyssou, R., Richard, E., et  
271 al. 2020. Evaluation of lockdown impact on SARS-CoV-2 dynamics through viral  
272 genome quantification in Paris wastewaters. medRxiv 2020.04.12.20062679; doi:  
273 <https://doi.org/10.1101/2020.04.12.20062679>

274 Zaneti,R.N., Girardi, V., Spilki, F.R., Mena, K., Campos-Westphalen, A.P., da  
275 Costa Colares, W.R. et al. 2020. QMRA of SARS-CoV-2 for workers in  
276 wastewater treatment plants. medRxiv 2020.05.28.20116277; doi:  
277 <https://doi.org/10.1101/2020.05.28.20116277>

278 Zhang, R., Li, Y., Zhang, A.L., Wang, Y., Molina, M.J., 2020. Identifying airborne  
279 transmission as the dominant route for the spread of COVID-19. Proc. Natl. Acad.  
280 Sci. 202009637. doi:10.1073/pnas.2009637117

281

282

283

284

285 **Figure 1. Left.** Sampling locations in urban rivers from Quito (Guerrero-Latorre *et al.*  
286 2018). M1 (0°14'00.27"S; 78°30'42.43"O), M2 (0°11'52.47"S;78°28'06.46"O), M3  
287 (0°00'42.98"S; 78°26'25.86"O). **Right.** Picture of direct discharge of wastewater into  
288 Machángara River (sampling point M1).

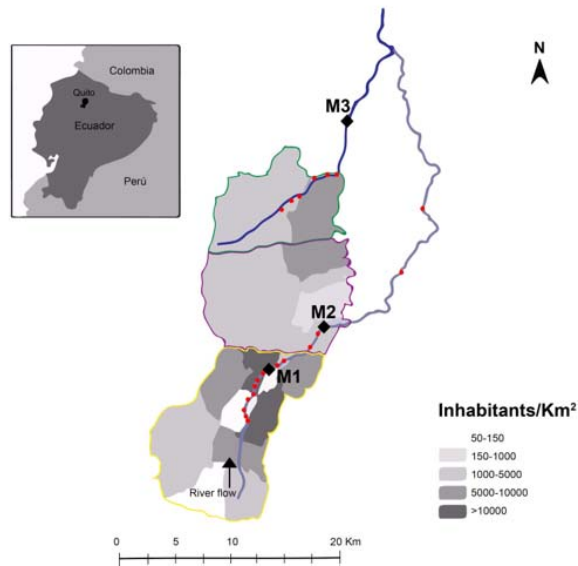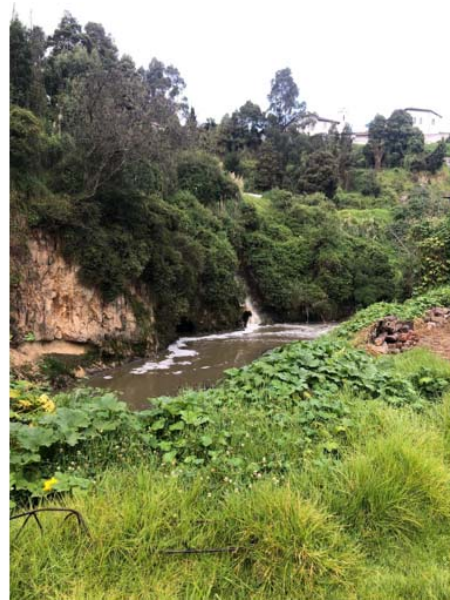

289

290

291 **Table 1.** Water quality parameters at sampling locations

| <b>Sampling points</b> | <b>pH</b> | <b>Conductivity</b> | <b>DBO<sub>5</sub> mg O<sub>2</sub>/L</b> | <b>DQO mg O<sub>2</sub>/L</b> | <b>HAdV GC/L</b> |
|------------------------|-----------|---------------------|-------------------------------------------|-------------------------------|------------------|
| M1                     | 7,73      | 653,07              | 13                                        | 35.706                        | 1,13E+04         |
| M2                     | 8,16      | 703,2               | 28*                                       | 63.353*                       | 2,18E+04         |
| M3                     | 7,83      | 696,48              | 16                                        | 43.941*                       | 2,60E+05         |

292

293 \*Parameters that do not comply with the Ecuadorian normative for aquatic life

294 preservation (Ministerio del Ambiente de Ecuador, 2015).

295

296

297 **Table 2.** Viral loads of SARS-CoV-2 per location and cumulative and active COVID-19

298 cases in the influence area.

299

| <b>Sampling points</b> | <b>SARS-CoV-2 N1<br/>GC/L</b> | <b>SARS-CoV-2 N2<br/>GC/L</b> | <b>Cumulative cases<br/>(total COVID-19 cases until 5th June)</b> | <b>Active cases<br/>(COVID-19 cases from the prior 14 days)</b> |
|------------------------|-------------------------------|-------------------------------|-------------------------------------------------------------------|-----------------------------------------------------------------|
| M1                     | 3,19E+06                      | 2,23E+06                      | 2077                                                              | 579                                                             |
| M2                     | 2,84E+05                      | 2,07E+05                      | 580                                                               | 81                                                              |
| M3                     | 2,91E+06                      | 8,55E+05                      | 358                                                               | 90                                                              |

300

301
